# Supplementary material for: The Relationship Between Oral Health and Cognitive Function Among Community‐Dwelling Japanese Older Adults: A Cross-sectional Study Using Toon Health Study Data
Source: Research Square preprint supplement (doi:10.21203/rs.3.rs-2532533/v1), 2023-02-13
Supplement: Supplementary file 1 [file 830544d0d69dc03dd87e62fb.xlsx]

## Sheet: Table 1
Table 1. Characteristics according to the number of teeth and masticatory status.
	The number of teeth					Masticatory status
	< 15	15–24	25+	p for difference		Good	Bad	p for difference
n	286	343	524			864	289
Age, year	72.014	69.9155	68.3282	<0.01		69.6863	69.7993	0.7743
Men, %*	120 (42.0)	119 (34.7)	199 (38.0)	0.17		326 (37.7)	112 (38.8)	0.7565
BMI, kg/m2	23.7648	23.6437	23.0967	<0.01		23.4027	23.4885	0.6906
Current smoking , %	6.59629	7.28653	5.21044	0.3412		6.88519	4.02319	0.043
Current drinking, %	48.0241	49.6814	54.2975	0.1344		50.221	54.8004	0.1351
Hypertension, %	54.6941	52.6722	51.9538	0.7608		52.295	54.509	0.5064
Diabetes mellitus, %	22.1597	21.3915	16.5765	0.0867		19.6725	18.5327	0.6645
University education, %	15.7996	18.0994	20.8025	0.1407		19.0532	17.8722	0.6093
Physical activity, mets・h/day	35.2616	34.9936	34.6364	0.1387		34.7798	35.2488	0.1057
Sleep duration, hour/day	6.65549	6.61694	6.67461	0.7516		6.71308	6.47406	<0.01
MoCA-J score, point	25.372	25.883	25.8159	0.044		25.7744	25.574	0.2792
Age- and sex adjusted mean or proportion.
*Chi-square test.

## Sheet: Table 2
Table 2. Multivariable-adjusted odds ratio (OR) and 95% confidence intervals (CI) of MCI according to the number of teeth and masticatory status.
		The number of teeth				Masticatory status
		< 15	15–24	25+		Good	Bad
All participants
	Number of participants	286	343	524		864	289
	Number of MCI, %	142 (49.7)	125 (36.4)	179 (34.2)		318 (36.8)	128 (44.3)
	Age- and sex- adjusted OR (95% CI)	1.43 (1.05–1.96)	1.00 (0.74–1.34)	1.00 (reference)		1.00 (reference)	1.38 (1.04–1.84)
	Multivariable-adjusted OR (95% CI)	1.34 (0.97–1.84)	0.94 (0.70–1.28)	1.00 (reference)		1.00 (reference)	1.41 (1.06–1.88)
	Multivariable-adjusted OR (95% CI)*	1.25 (0.90–1.72)	0.85 (0.62–1.17)	1.00 (reference)		1.00 (reference)	1.44 (1.06–1.94)
< 75 years
	Number of participants	184	267	457		681	227
	Number of MCI, %	82 (44.6)	78 (29.2)	140 (30.6)		210 (30.8)	90 (39.7)
	Age- and sex- adjusted OR (95% CI)	1.68 (1.17–2.42)	0.95 (0.68–1.34)	1.00 (reference)		1.00 (reference)	1.49 (1.08–2.06)
	Multivariable-adjusted OR (95% CI)	1.58 (1.10–2.27)	0.88 (0.62–1.23)	1.00 (reference)		1.00 (reference)	1.50 (1.09–2.08)
	Multivariable-adjusted OR (95% CI)*	1.43 (0.99–2.08)	0.76 (0.53–1.10)	1.00 (reference)		1.00 (reference)	1.57 (1.11–2.20)
≥ 75 years
	Number of participants	102	76	67		183	62
	Number of MCI, %	60 (58.8)	47 (61.8)	39 (58.2)		108 (59.0)	38 (61.3)
	Age- and sex- adjusted OR (95% CI)	0.89 (0.46–1.71)	1.06 (0.54–2.10)	1.00 (reference)		1.00 (reference)	1.12 (0.61–2.04)
	Multivariable-adjusted OR (95% CI)	0.85 (0.43–1.66)	1.06 (0.53–2.14)	1.00 (reference)		1.00 (reference)	1.18 (0.63–2.19)
	Multivariable-adjusted OR (95% CI)*	0.82 (0.42–1.63)	1.02 (0.50–2.09)	1.00 (reference)		1.00 (reference)	1.21 (0.64–2.27)
Multivariable-adjusted OR (95% CI): Adjusted for age, sex, BMI, physical activity, current drinking and smoking status, sleep duration, education level, hypertension and diabetes mellitus.
*Further adjusted for both the number of teeth and masticatory status mutually.
